# Supplementary material for: Current Situation, Determinants, and Solutions to Drug Shortages in Shaanxi Province, China: A Qualitative Study
Source: PubMed Central journal article supplement (PMC5079602; doi:10.1371/journal.pone.0165183), 2016-10-25
Supplement: pone.0165183.s003.pdf [file pone.0165183.s003.pdf]

## SUPPLEMENTARY MATERIAL

### TEXT S3. INTERVIEW GUIDE –HOSPITAL PHARMACISTS

In this context, we will define drug shortages as a deficiency in the supply of a medicinal product which hinders meeting the demand of the product at a patient level.

#### General information

1. Name of the hospital: \_\_\_\_\_
2. Gender: \_\_\_\_\_
3. Age: \_\_\_\_\_
4. Years of medicine related work experience: \_\_\_\_\_

List specific names of drugs in shortage (generic name, brand name, strength and dosage form) during last 12 months in your hospital.

#### Data collection form

| Number | Generic name | Brand name | Strength | Dosage form |
|--------|--------------|------------|----------|-------------|
| 1      |              |            |          |             |
| 2      |              |            |          |             |
| 3      |              |            |          |             |
| 4      |              |            |          |             |
| 5      |              |            |          |             |
| 6      |              |            |          |             |
| 7      |              |            |          |             |
| 8      |              |            |          |             |
| 9      |              |            |          |             |
| 10     |              |            |          |             |

#### The causes of drug shortages

What are the reasons for drug shortages phenomena in your opinion?

1. **What are the determinants leading to drug shortages from the perspectives of medicinal producers?**
  - ✓ Raw materials
  - ✓ change of GMP request
  - ✓ few producers with the license to produce corresponding drugs
  - ✓ internal decision-making process

2. **What are the determinants leading to drug shortages from the perspectives of drug wholesalers?**
  - ✓ The scales and number of wholesalers
  - ✓ Distribute the medicines selectively
3. **What are the determinants leading to drug shortages from the perspectives of healthcare institutions?**
  - ✓ Poor drug inventory management
  - ✓ Poor communication with wholesalers
  - ✓ Use drugs selectively
4. **What are the determinants leading to drug shortages from the perspectives of medicines themselves?**
  - ✓ Price
  - ✓ Low demands or uncertainty demands
  - ✓ Complex manufacture processes
5. Are there any other reasons causing drug shortages?
6. Among those causes, what are the three most important ones in your opinion?

#### **Solutions for drug shortages**

How to solve the drug shortage problem in your opinion?

1. **What the governmental authorities could do to manage drug shortage problem?**
  - ✓ Strengthen the supervision of material market
  - ✓ Strengthen the management of drug registration
  - ✓ Modify the drug pricing policy
  - ✓ Establish the platform for managing drug shortages
  - ✓ Set up dedicated department to deal with drug shortages
  - ✓ Build drug shortages related laws and regulations
  - ✓ Establish pharmaceutical reserve system for drugs in short supply
  - ✓ Establish the guideline managing drug shortages
  - ✓ Others.....
2. **What the drug manufactures could do to deal with drug shortages?**
  - ✓ Active in promoting the drug quality and meet the GMP request

- ✓ Take “preventing drug shortage” as one of the business goals
- ✓ Establish good communications with suppliers of raw materials
- ✓ Improve the prediction of market demands
- ✓ Enhance production flexibility to meet the demand uncertainty in the market
- ✓ Build contingency mechanism for drug shortages problem
- ✓ Improve the supply of the alternatives of drugs in short supply
- ✓ Others.....

**3. What the wholesalers could do to deal with drug shortages?**

- ✓ Standardize the distribution behaviour in the enterprises
- ✓ Enhance the communication with manufactures and other pharmaceutical agents
- ✓ Others.....

**4. What the healthcare institutions could do deal with drug shortages?**

- ✓ Increase the number of wholesalers
- ✓ Improve the inventory management
- ✓ Reinforce the management of wholesalers
- ✓ Establish the guidelines for managing drug shortages and put into action

**5. Are there any other solutions to manage this problem?**

**6. Among those solutions, what are the three most important ones in your opinion?**
